# Supplementary material for: Spatial patterning of P granules by RNA-induced phase separation of the intrinsically-disordered protein MEG-3
Source: eLife. 2016 Dec 3;5:e21337. doi: 10.7554/eLife.21337 (PMC5262379; doi:10.7554/eLife.21337)
Supplement: Supplemental file 1. — All strains were generated in this study by genome editing or crossing. No transgenic lines were used. Independent edits displayed the same phenotypes. The mex-5(S404A) lines could not be maintained due to semi-dominant maternal-effect sterility (91.6%) and recessive maternal-effect lethality (100%). DOI: http://dx.doi.org/10.7554/eLife.21337.014 [file elife-21337-fig1.xlsx]

## Sheet: Strains generated in this study
					oigos Used used
Strain	Genotype	Description	Method	Derived from	Guide RNA sequence	Repair Template(s)	Notes
JH3374	meg-3(ax3051); meg-4(ax2080)	MEG-3::OLLAS; MEG-4::3xFLAG	CRISPR/Cas9	JH3247[meg-4(ax2080)]	tcagtacaatcattgatctc	cggaaatcggatcctatcaaatacttgaatgtaaaacgggattggctggaatctatttttgatccacccagagatcaatccggattcgccaacgagctcggaccacgtctcatgggaaagtgattgtaccaatttatatctattacttgtagactatattgtatgttattcttgttcattaaccctttat
JH3477	meg-3(ax3051); meg-4(ax3052)	MEG-3::OLLAS; meg-4 deletion	CRISPR/Cas9	JH3374	tctgcccaggaacttgtaac, ggagtttggcagatcacatg	gttgcaggtatgagttcttcaaagctttcctcatgtgggaagtttgtccagagcagagg aacgggtagttttctattgttatcaggactgctgc
JH3422	meg-3(ax3056); meg-4(ax2080)	MEG-3IDR::OLLAS; MEG-4::3xFLAG	CRISPR/Cas9	JH3247[meg-4(ax2080)]	tggagttgggatgattgacg, tcagtacaatcattgatctc	ggaacaatgtggatgtaaagagaacaccttcctcgtccggattcgccaacgagctcggaccacgtctcatgggaaagagagatcaatgattgtaccaatttatatctattacttg	1.5 % Sterile (n = 264)
JH3479	meg-3(ax3056); meg-4(ax3052)	MEG-3IDR::OLLAS; meg-4 deletion	CRISPR/Cas9	JH3422	same as JH3477	same as JH3477	41.8 % Sterile (n = 349)
JH3503	meg-3(ax3054)	MEG-3::meGFP	CRISPR/Cas9	N2	gaagtctgcagagaagacgg	PCR using primers gcaacgcctttaacagtattcctcctacggcccccgtgagtaaaggagaagaac; gtttgcaagttgcggcggaagtctgcagagaagaccttgtacagctcgtccatgc on pap835
JH3475	meg-3(ax3055); meg-4(ax3052)	meg-3 delete; meg-4 delete	CRISPR/Cas9	JH3477	tcctcaaaaccttacccaag, tcgagtttggcagaccgctt	gcaggtatgagttcctcaaaaccttacccaagggcaggatgtcagccagaggagggatcctaattgtaccaatttatatctattacttgtagactatattg
JH3499	mex-5(ax3057)	MEX-5(ZF-)::OLLAS	CRISPR/Cas9	JH3190[mex-5(ax2043)]	(r274) actacaagactcgtctttgc, (k318) gtacaagacaaagctgtgca	(r274e) gattcccaattccagaaactgacagtcaacaaccaccaaattataaaacagagctctgcatgatgcacgcatctggaatcaaaccatgtg, (k318e) ctccggctcgctatccgaacaacaagtacaagacagagctctgtaaaaatttcgctcgtggaggaactggattctgcccgtatg	2 independent edits
JH3500	mex-5(ax3058); meg-3(ax3054)	MEX-5(ZF-); MEG-3::meGFP	CRISPR/Cas9	JH3503	same as JH3499	same as JH3499	2 independent edits
JH3501	mex-5(ax3059); meg-3(ax3054)	MEX-5(ZF-,S404A); MEG-3::meGFP	CRISPR/Cas9	JH3500	gaucgcgaccagcauuggag	ctgatgtctttttctcaattacataattttcagcgcaatgatgtgtctttccaatgccgggcgcgatcttcaagccggaggtgattacaatcaacc	2 independent edits
JH3296	mex-5(ax3050)	mCherry::MEX-5	CRISPR/Cas9	N2	ggcaucaaauagugucucgu, aauagugucucgucggccgg	PCR using primers gataatcaattgaatgtttcagacagagaatggtctcaaagggtgaagaagataacatggc; ggctgggttgtcgtaggtgacactgatcctcccgcggaggacacactatttgatgccgctttcttatacaattcatccatgccacctgtcgag on pCFJ90
N/A	mex-5(s404a) - no allele designated	mCherry::MEX-5(S404A)	CRISPR/Cas9	JH3296	same as JH3501	same as JH3501	3 independent edits
N/A	mex-5(s404a) - no allele designated	MEX-5(S404A); MEG-3::meGFP	CRISPR/Cas9	JH3503	same as JH3501	same as JH3501	5 independent edits
JH3348	mex-5(ax3050); glh-1(ax3064)	mCherry::MEX-5 ; GLH-1::eGFP	Cross	JH3296 x JH3333[glh-1(ax3064)]
JH3502	mex-5(ax2043); meg-3(ax3051); meg-4(ax2080)	OLLAS::MEX-5 ; MEG-3::OLLAS	Cross	JH3190[mex-5(ax2043)] x JH3374
JH3516	mex-5(ax3050); meg-3(ax3054)	mCherry::MEX-5 ; MEG-3::meGFP	Cross	JH3296 x JH3503 [meg-3(ax3054)]
JH3288	pgl-3(bn104); meg-4(ax2080)	pgl-3(bn104); MEG-4::3xFLAG	Cross	SS608[pgl-1(bn104)] x JH3247[meg-4(ax2080)]
