# Supplementary figures and images for: Spatial patterning of P granules by RNA-induced phase separation of the intrinsically-disordered protein MEG-3
Source: eLife journal article supplement (doi:10.7554/elife.21337), 2016-12-03

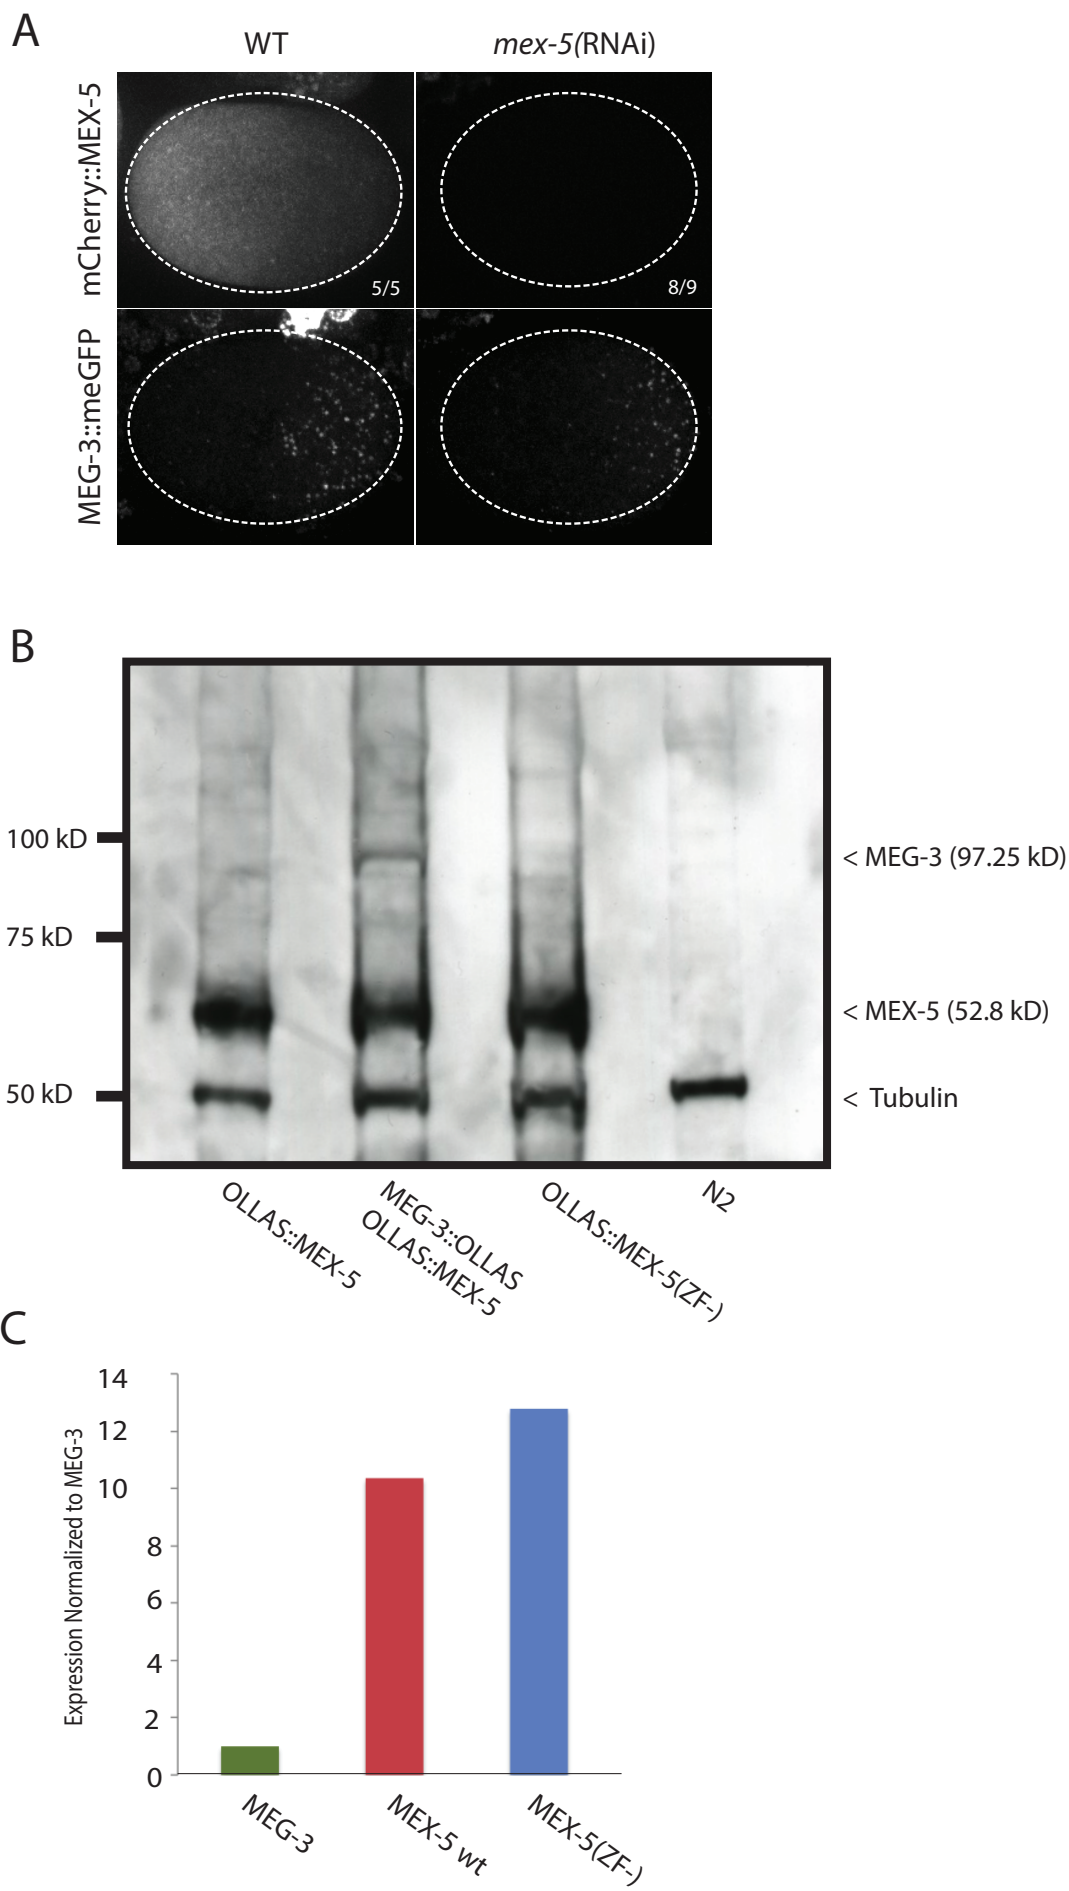

Figure 2 - Supplement 1

Supplement: supp [file elife-21337-supp-v1.zip]

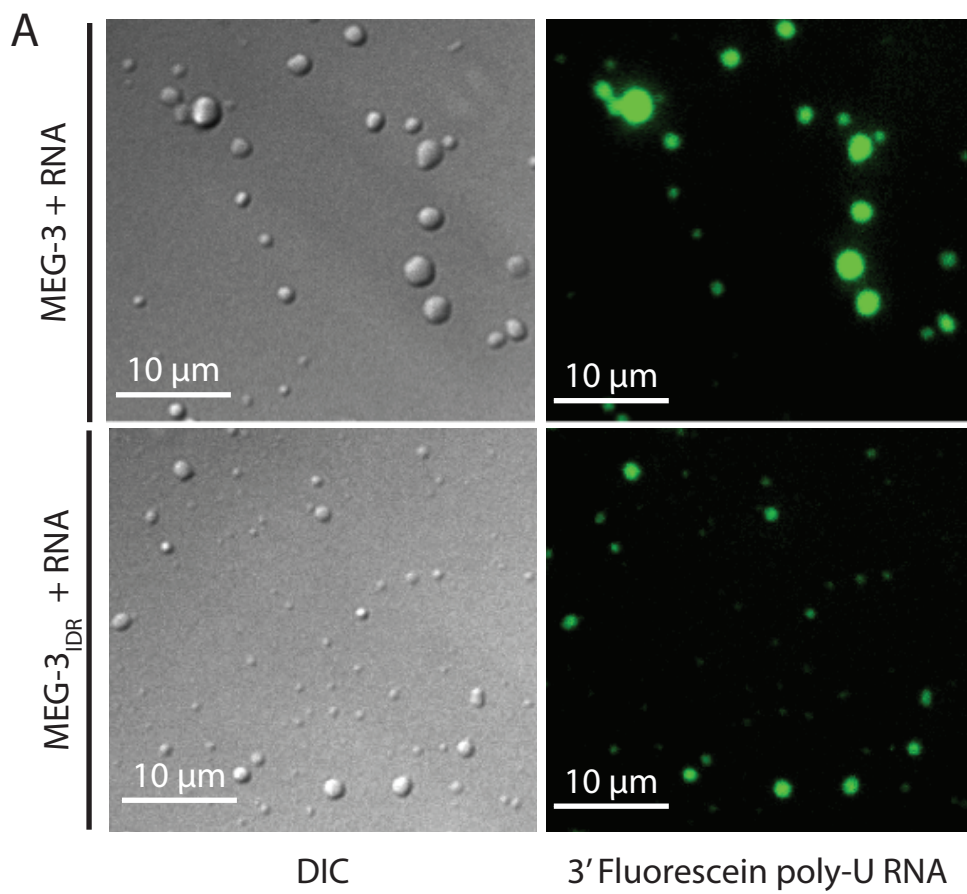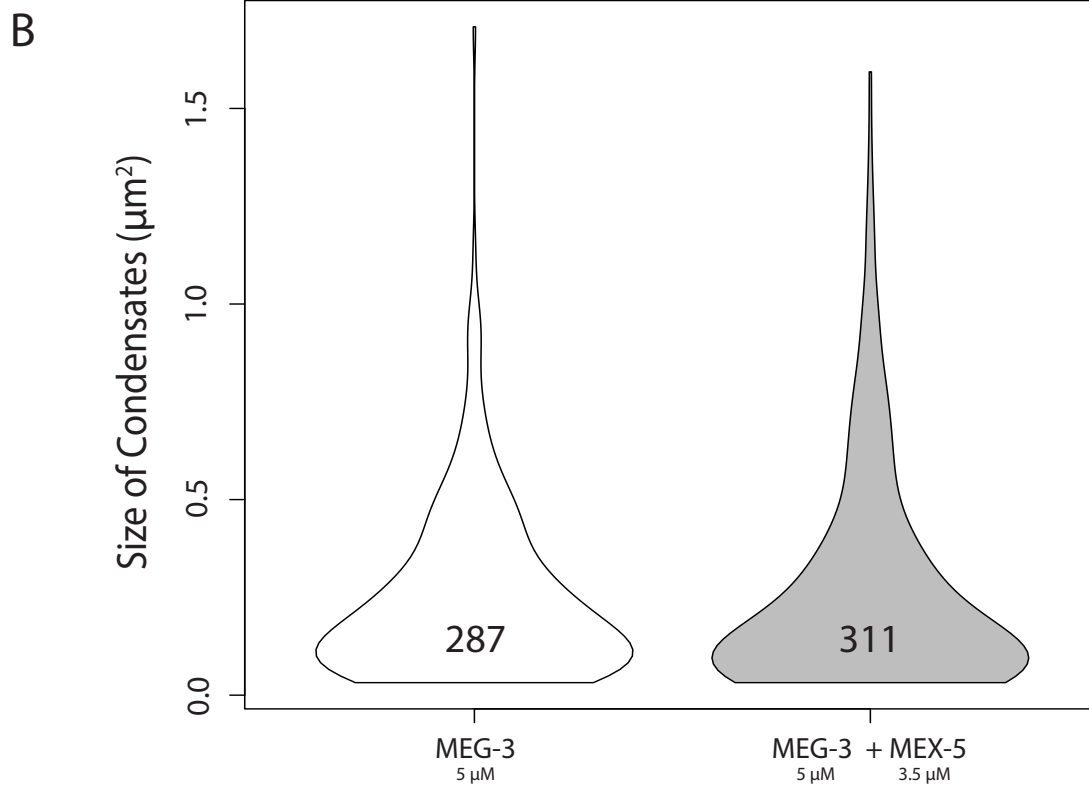

Figure 4 - Supplement 2

Supplement: supp [file elife-21337-supp-v1.zip]

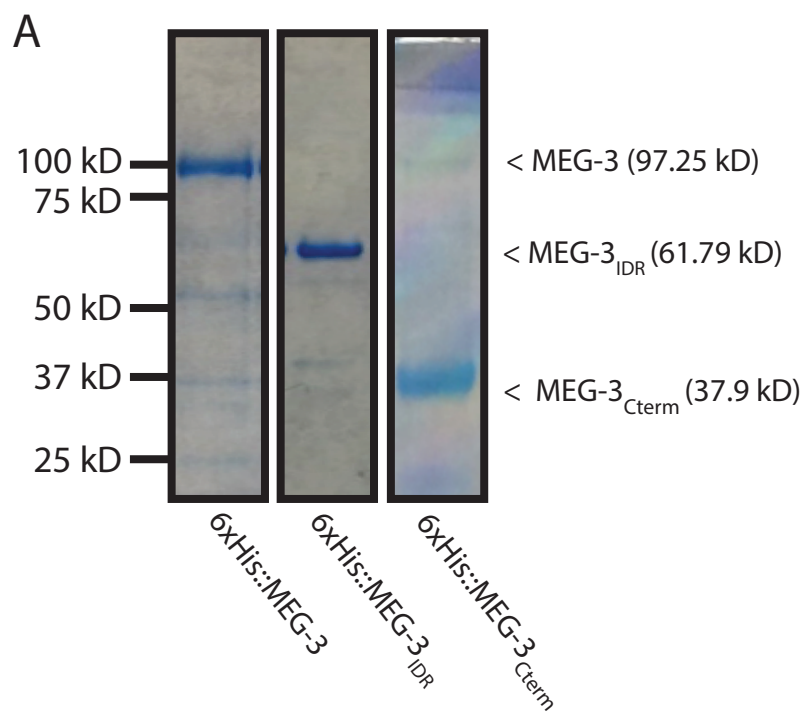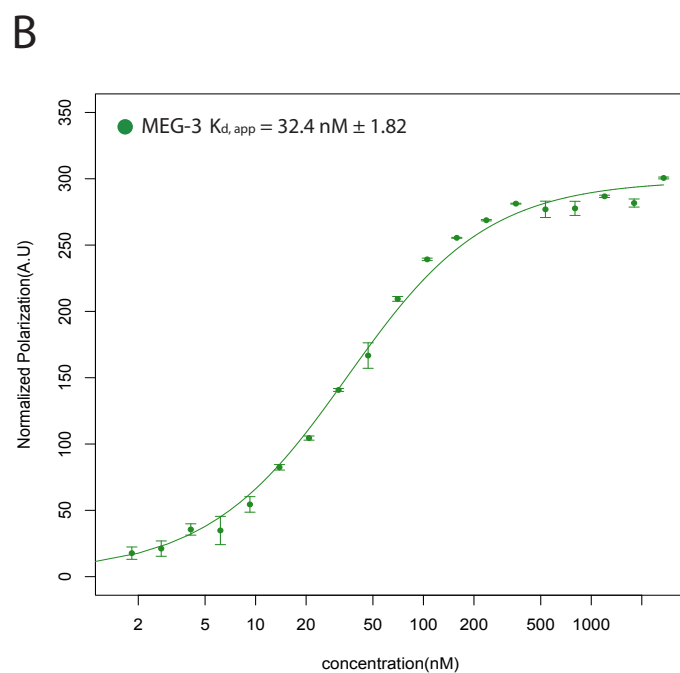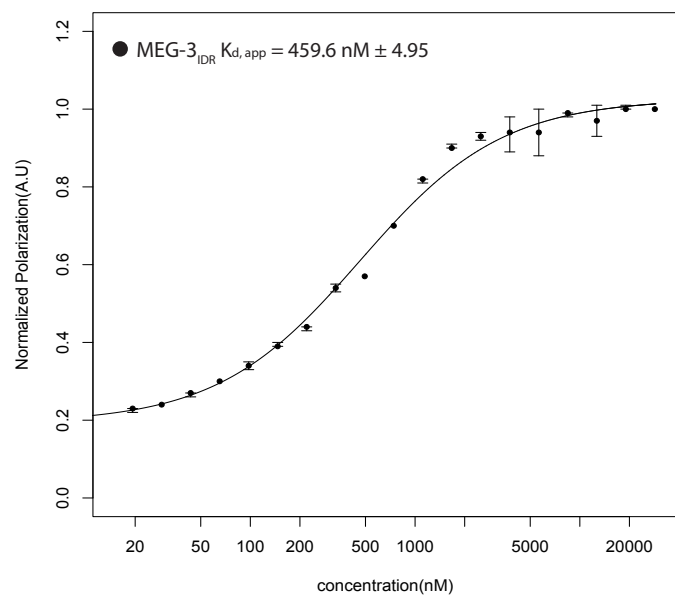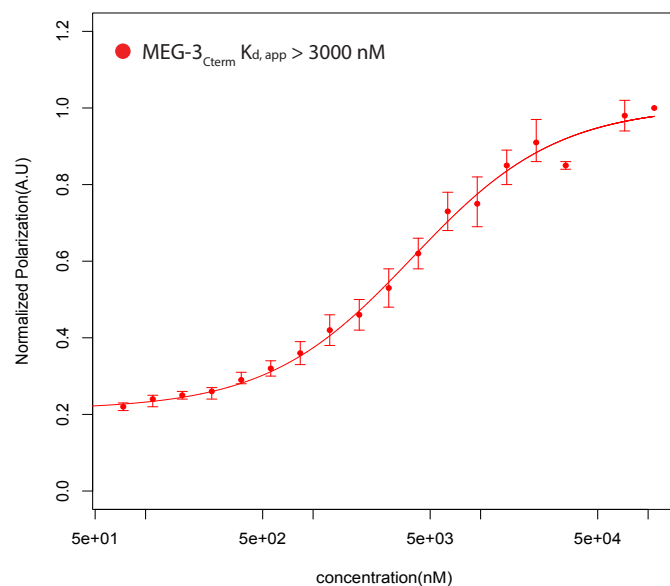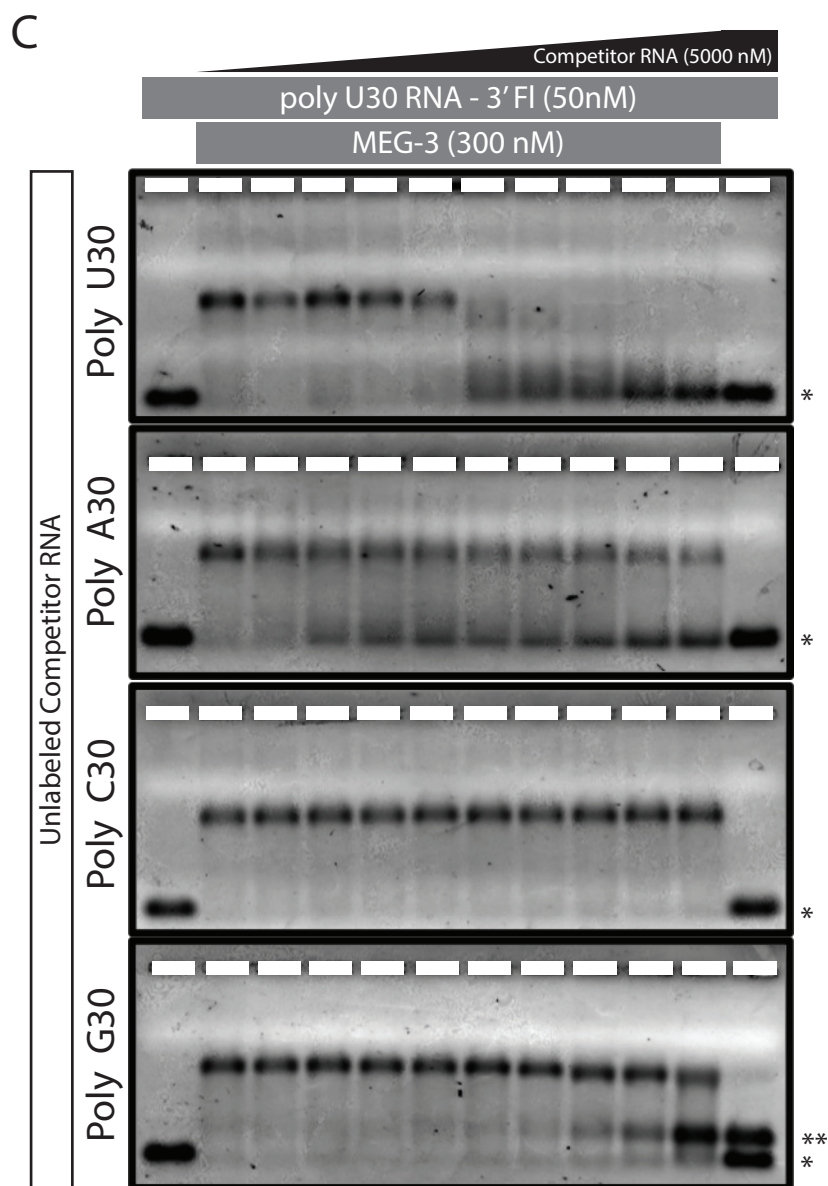

Figure 3 - Supplement 1

Supplement: supp [file elife-21337-supp-v1.zip]

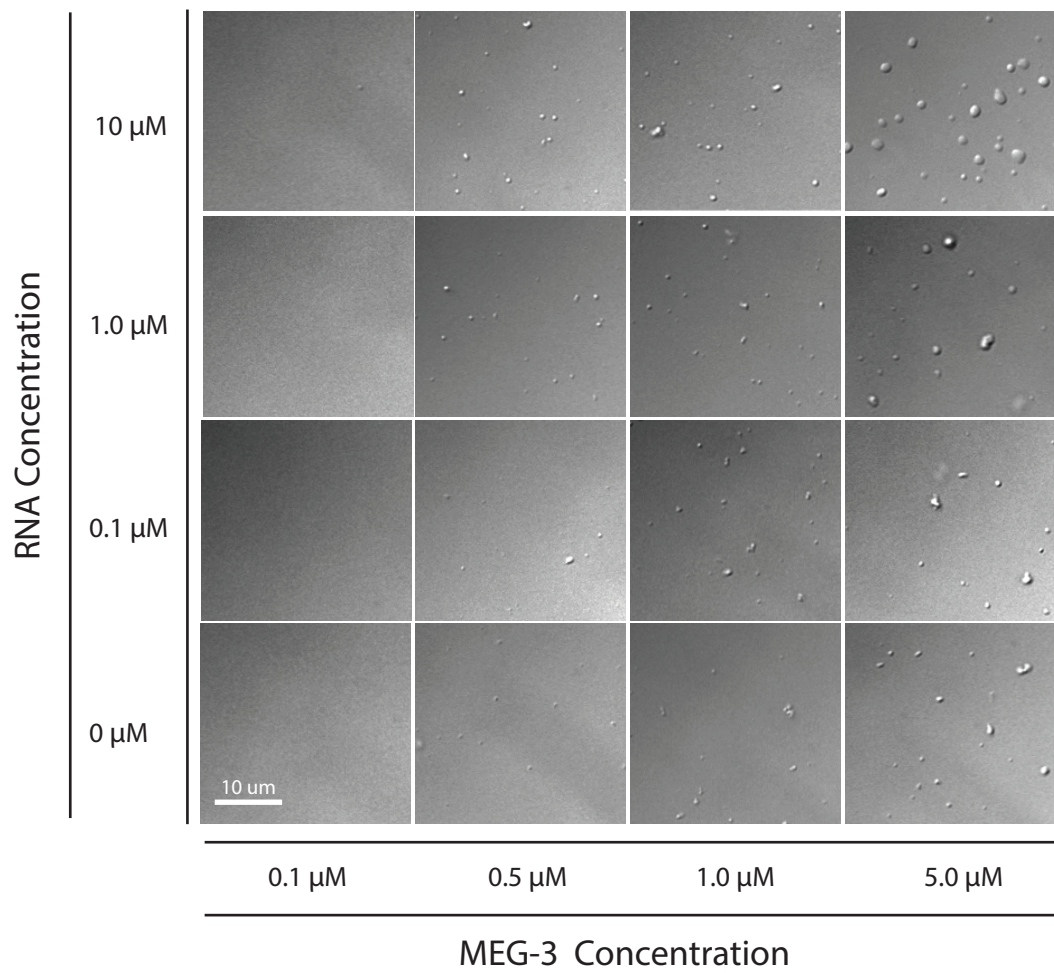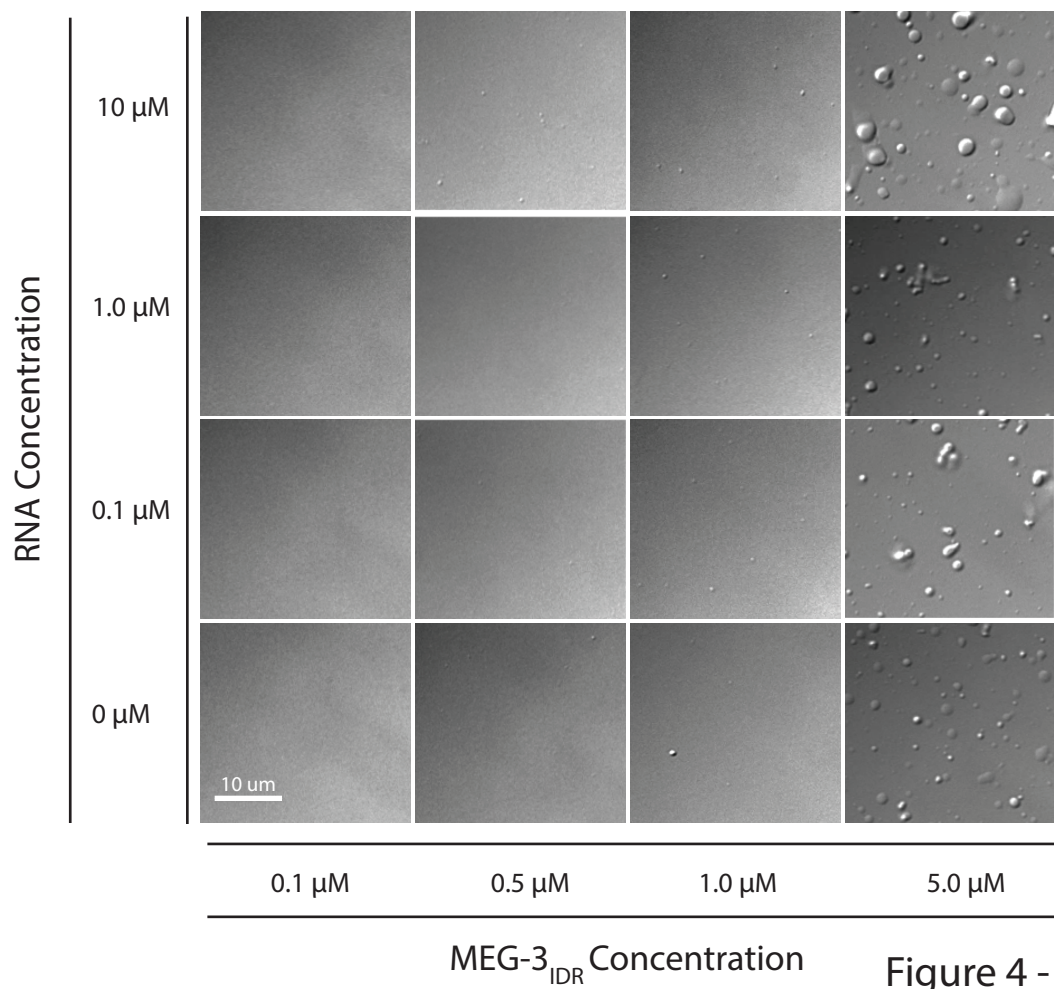

Figure 4 - Supplement 1

Supplement: supp [file elife-21337-supp-v1.zip]

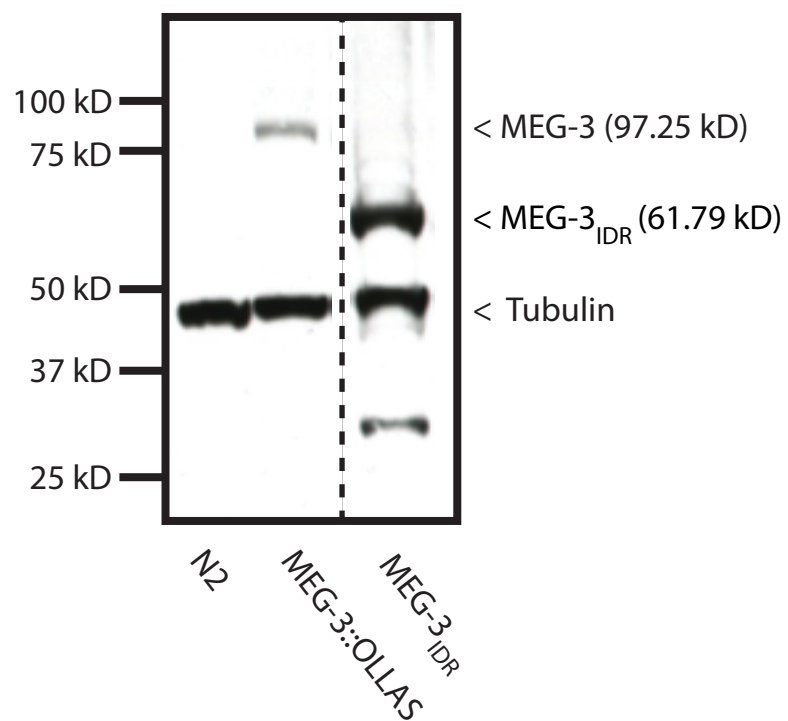

Figure 5 - Supplement 1

Supplement: supp [file elife-21337-supp-v1.zip]

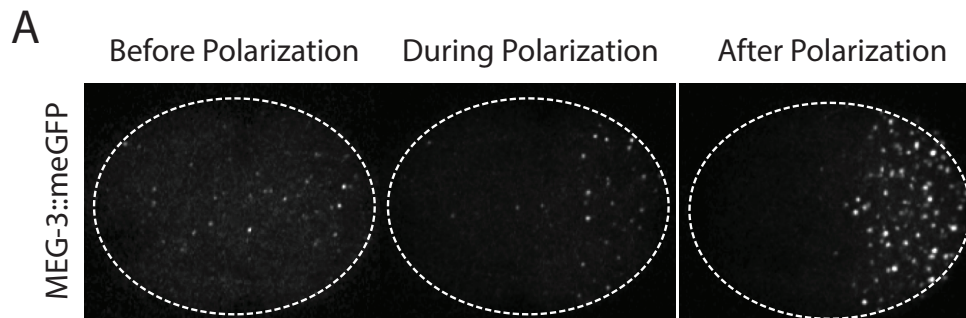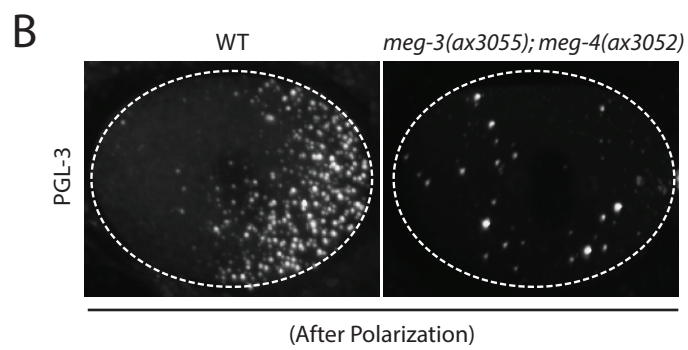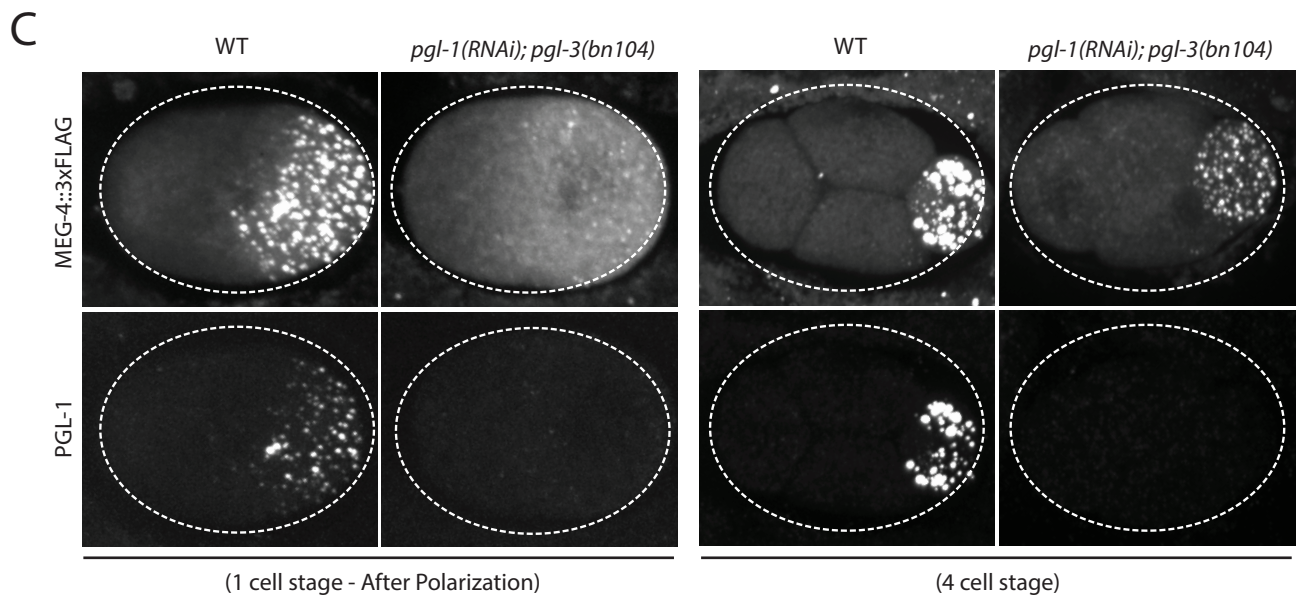

Figure 1 - Supplement 1

Supplement: supp [file elife-21337-supp-v1.zip]
